# Supplementary material for: Self-assembly process of China rose-like β-Co(OH)2 and its topotactic conversion route to Co3O4 with optimizable catalytic performance
Source: Royal Society of Chemistry journal article supplement (doi:10.1039/c5ce01416f), 2015-01-01
Supplement: c5ce01416f1.pdf [file c5ce01416f1.pdf]

### Supporting information

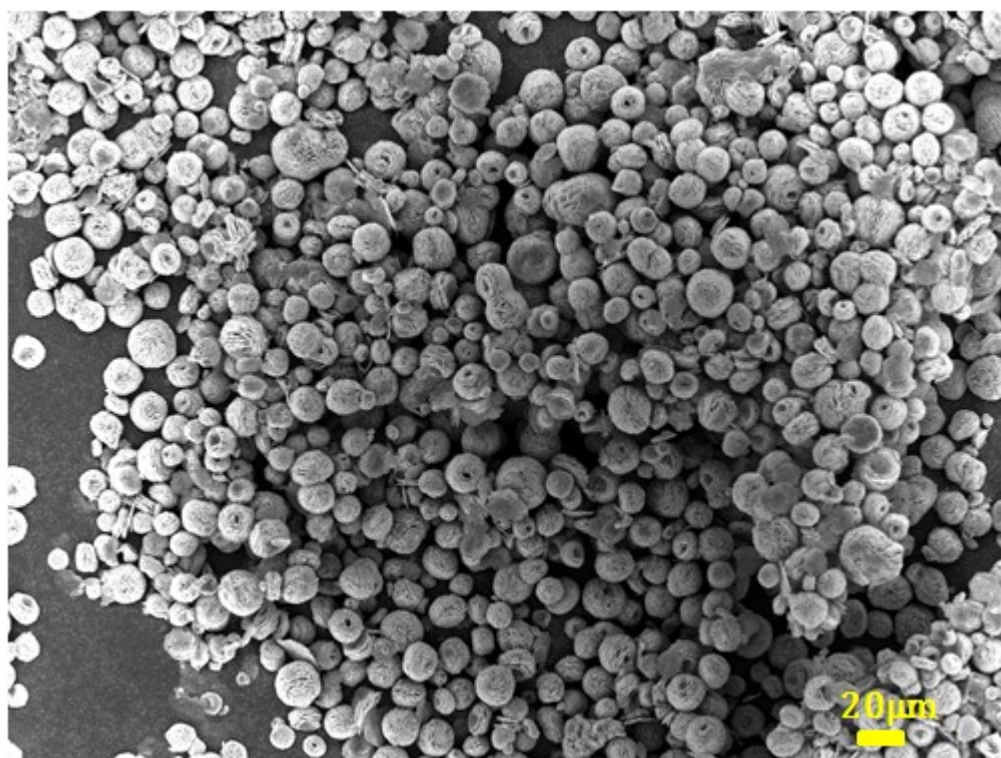

**Fig. S1** lower magnification SEM image of China rose-like structured  $\beta$ -Co(OH)<sub>2</sub>

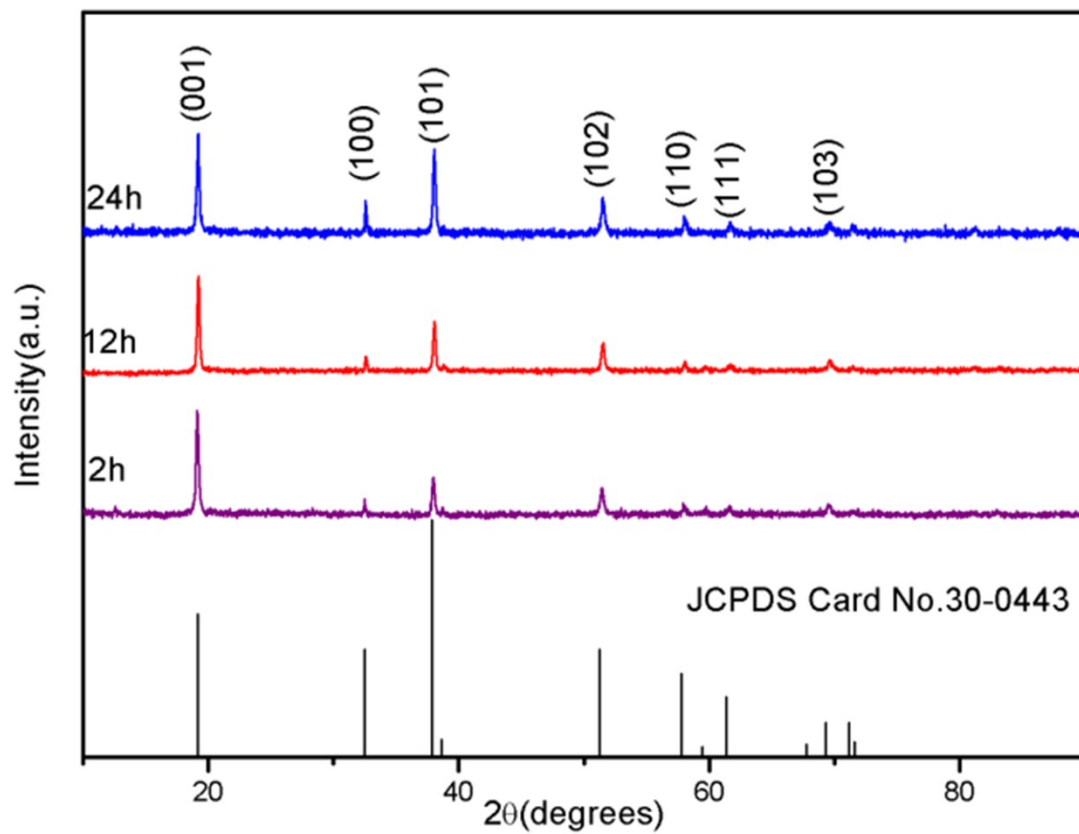

**Fig. S2** XRD patterns of the time-dependent evolution in the form of  $\beta$ -Co(OH)<sub>2</sub>

China rose-like flowers at time of 2, 12, and 24 h, respectively.

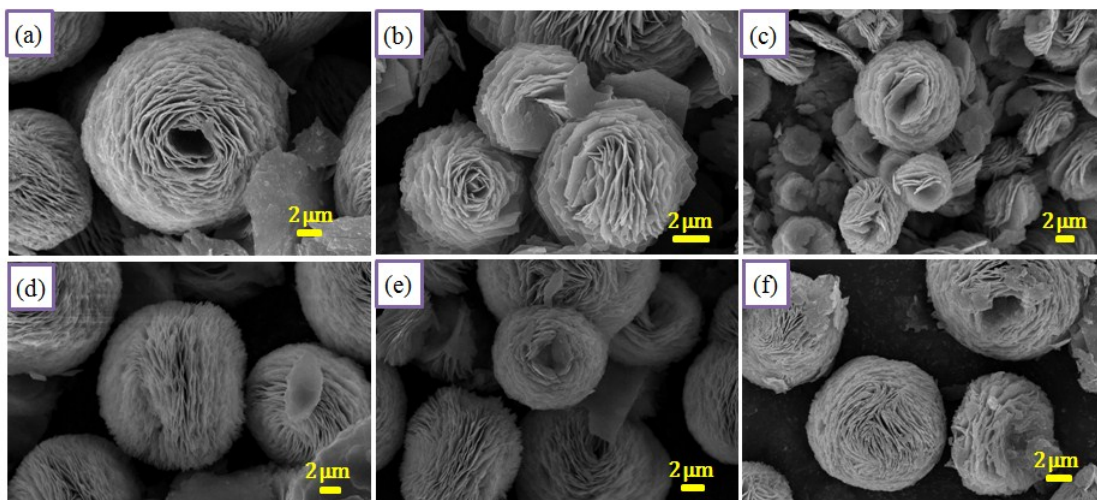

**Fig. S3** Large scale SEM images of products at different calcination temperature: (a) precursor; (b) 280 °C; (c) 360 °C; (d) 400 °C; (e) 440 °C; (f) 520 °C.
